# Supplementary material for: Sustainable Development Goals (SDGs) Priorities of Senior High School Students and Global Public: Recommendations for Implementing Education for Sustainable Development (ESD)
Source: Hindawi journal article supplement (doi:10.1155/2022/2555168), 2022-03-08
Supplement: f1 [file 2555168.f1.pdf]

## Appendix

**Table S1.** Questionnaire on the Awareness of SDG of Senior High School Students (Yuan et al., 2021).

| Number                                                                           | Question                                | Variable Type | Options                                                                                                                            |
|----------------------------------------------------------------------------------|-----------------------------------------|---------------|------------------------------------------------------------------------------------------------------------------------------------|
| <i>Demographic Questions</i>                                                     |                                         |               |                                                                                                                                    |
| Q1                                                                               | Age                                     | Quantitative  | 14,15,16,17,18,19                                                                                                                  |
| Q2                                                                               | Gender                                  | Categorical   | Male, Female                                                                                                                       |
| Q3                                                                               | Grade                                   | Quantitative  | 10,11,12                                                                                                                           |
| <i>SDG' Involvement in Courses and the Corresponding Subjects</i>                |                                         |               |                                                                                                                                    |
| Q4.1                                                                             | No Poverty                              | Ordinal       | Likert Scale (1–5)<br>1: Never Learned At All<br>5: Have Studied in Depth<br>* Fill in the specific subjects when choosing 4 or 5. |
| Q4.2                                                                             | Zero Hunger                             |               |                                                                                                                                    |
| Q4.3                                                                             | Good Health and Well-being              |               |                                                                                                                                    |
| Q4.4                                                                             | Quality Education                       |               |                                                                                                                                    |
| Q4.5                                                                             | Gender Equality                         |               |                                                                                                                                    |
| Q4.6                                                                             | Clean Water and Sanitation              |               |                                                                                                                                    |
| Q4.7                                                                             | Affordable and Clean Energy             |               |                                                                                                                                    |
| Q4.8                                                                             | Decent Work and Economic Growth         |               |                                                                                                                                    |
| Q4.9                                                                             | Industry, Innovation and Infrastructure |               |                                                                                                                                    |
| Q4.10                                                                            | Reduced Inequalities                    |               |                                                                                                                                    |
| Q4.11                                                                            | Sustainable Cities and Communities      |               |                                                                                                                                    |
| Q4.12                                                                            | Responsible Consumption and Production  |               |                                                                                                                                    |
| Q4.13                                                                            | Climate Action                          |               |                                                                                                                                    |
| Q4.14                                                                            | Life below Water                        |               |                                                                                                                                    |
| Q4.15                                                                            | Life on Land                            |               |                                                                                                                                    |
| Q4.16                                                                            | Peace, Justice and Strong Institutions  |               |                                                                                                                                    |
| Q4.17                                                                            | Partnerships for the Goals              |               |                                                                                                                                    |
| <i>Course Subjects that support the realization of SDG in Senior High School</i> |                                         |               |                                                                                                                                    |
| Q5.1                                                                             | Chinese and Native Culture              | Categorical   | Yes, No                                                                                                                            |
| Q5.2                                                                             | Math                                    |               |                                                                                                                                    |
| Q5.3                                                                             | Foreign Language                        |               |                                                                                                                                    |
| Q5.4                                                                             | Physics                                 |               |                                                                                                                                    |
| Q5.5                                                                             | Chemistry                               |               |                                                                                                                                    |
| Q5.6                                                                             | Biology                                 |               |                                                                                                                                    |
| Q5.7                                                                             | History                                 |               |                                                                                                                                    |
| Q5.8                                                                             | Geography                               |               |                                                                                                                                    |
| Q5.9                                                                             | Politics and Economics                  |               |                                                                                                                                    |
| Q5.10                                                                            | Computer Science                        |               |                                                                                                                                    |
| Q5.11                                                                            | Career and Psychology                   |               |                                                                                                                                    |
| Q5.12                                                                            | Physical Education                      |               |                                                                                                                                    |
| Q5.13                                                                            | Arts                                    |               |                                                                                                                                    |
| Q5.14                                                                            | Technology and Laboratory Courses       |               |                                                                                                                                    |
| <i>Students' Priorities of SDG</i>                                               |                                         |               |                                                                                                                                    |
| Q6.1                                                                             | No Poverty                              | Categorical   | Yes, No                                                                                                                            |
| Q6.2                                                                             | Zero Hunger                             |               |                                                                                                                                    |
| Q6.3                                                                             | Good Health and Well-being              |               |                                                                                                                                    |
| Q6.4                                                                             | Quality Education                       |               |                                                                                                                                    |
| Q6.5                                                                             | Gender Equality                         |               |                                                                                                                                    |
| Q6.6                                                                             | Clean Water and Sanitation              |               |                                                                                                                                    |
| Q6.7                                                                             | Affordable and Clean Energy             |               |                                                                                                                                    |
| Q6.8                                                                             | Decent Work and Economic Growth         |               |                                                                                                                                    |

**Table S1.** Questionnaire on the Awareness of SDG of Senior High School Students (Yuan et al., 2021).

| <b>Number</b> | <b>Question</b>                         | <b>Variable Type</b> | <b>Options</b> |
|---------------|-----------------------------------------|----------------------|----------------|
| Q6.9          | Industry, Innovation and Infrastructure |                      |                |
| Q6.10         | Reduced Inequalities                    |                      |                |
| Q6.11         | Sustainable Cities and Communities      |                      |                |
| Q6.12         | Responsible Consumption and Production  |                      |                |
| Q6.13         | Climate Action                          |                      |                |
| Q6.14         | Life below Water                        |                      |                |
| Q6.15         | Life on Land                            |                      |                |
| Q6.16         | Peace, Justice and Strong Institutions  |                      |                |
| Q6.17         | Partnerships for the Goals              |                      |                |
